# Supplementary material for: A Network Pharmacology Approach to Reveal the Underlying Mechanisms of Artemisia annua on the Treatment of Hepatocellular Carcinoma
Source: Hindawi journal article supplement (doi:10.1155/2021/8947304), 2021-02-22
Supplement: f1 [file 8947304.f1.pdf]

TABLE 1

| Mol ID    | Molecule Name                                                             | OB(%) | DL   |
|-----------|---------------------------------------------------------------------------|-------|------|
| MOL002235 | EUPATIN                                                                   | 50.8  | 0.41 |
| MOL000354 | isorhamnetin                                                              | 49.6  | 0.31 |
| MOL000359 | sitosterol                                                                | 36.91 | 0.75 |
| MOL004083 | Tamarixetin                                                               | 32.86 | 0.31 |
| MOL004112 | Patuletin                                                                 | 53.11 | 0.34 |
| MOL000422 | kaempferol                                                                | 41.88 | 0.24 |
| MOL000449 | Stigmasterol                                                              | 43.83 | 0.76 |
| MOL004609 | Areapillin                                                                | 48.96 | 0.41 |
| MOL005229 | Artemetin                                                                 | 49.55 | 0.48 |
| MOL000006 | luteolin                                                                  | 36.16 | 0.25 |
| MOL007274 | Skrofullein                                                               | 30.35 | 0.3  |
| MOL007389 | artemisitene                                                              | 54.36 | 0.31 |
| MOL007400 | vicenin-2_qt                                                              | 45.84 | 0.21 |
| MOL007401 | Cirsiliol                                                                 | 43.46 | 0.34 |
| MOL007404 | vitexin_qt                                                                | 52.18 | 0.21 |
| MOL007412 | DMQT                                                                      | 42.6  | 0.37 |
|           | [(2S)-2-[[[(2S)-2-(benzoylamino)-3-phenylpropanoyl]amino]-3-phenylpropyl] |       |      |
| MOL007415 | acetate                                                                   | 58.02 | 0.52 |
| MOL007423 | 6,8-di-c-glucosylapigenin_qt                                              | 59.85 | 0.21 |
| MOL007424 | artemisinin                                                               | 49.88 | 0.31 |
| MOL007425 | dihydroartemisinin                                                        | 50.75 | 0.3  |
| MOL007426 | deoxyartemisinin                                                          | 54.47 | 0.26 |
| MOL000098 | quercetin                                                                 | 46.43 | 0.28 |
